# Supplementary material
Source: HighWire-hosted journal article supplement (https://erj.ersjournals.com/content/55/6/2000041)
Supplement: inline-supplementary-material-1 [file inline-supplementary-material-1.pdf]

**Online supplement table S1: Baseline demographics in patients with subtypes of IPAH<sub>mild-LD</sub> compared with IPAH<sub>no-LD</sub>**

|                                            | IPAH <sub>no-LD</sub>            | IPAH <sub>mild-LD</sub> emphysema | IPAH <sub>mild-LD</sub> fibrosis | IPAH <sub>mild-LD</sub> Mixed |
|--------------------------------------------|----------------------------------|-----------------------------------|----------------------------------|-------------------------------|
| <b>Number</b>                              | 303                              | 125                               | 39                               | 26                            |
| <b>Female (%)</b>                          | 73                               | 52                                | 39                               | 39                            |
| <b>Age</b>                                 | 53 ±17 <sup>¶, *, #</sup>        | 70 ±9 <sup>z</sup>                | 71 ±10 <sup>z</sup>              | 69 ±11 <sup>z</sup>           |
| <b>WHO FC I/II/III/IV (%)</b>              | 0/21/60/19                       | 0/9/60/31                         | 0/13/49/38                       | 0/4/50/46                     |
| <b>BMI (kg/m<sup>2</sup>)</b>              | 29 ±6                            | 28 ±6                             | 29 ±5                            | 28 ±5                         |
| <b>mRAP (mmHg)</b>                         | 11 ±6                            | 11 ±5                             | 11 ±5                            | 10 ±5                         |
| <b>mPAP (mmHg)</b>                         | 55 ±13 <sup>¶, *, #</sup>        | 51 ±9 <sup>z</sup>                | 48 ±10 <sup>z</sup>              | 51 ±8 <sup>z</sup>            |
| <b>PAWP (mmHg)</b>                         | 10 ±3 <sup>¶</sup>               | 11 ±3 <sup>z</sup>                | 10 ±4                            | 10 ±3                         |
| <b>PVR (WU)</b>                            | 11.9 ±5.8                        | 10.9 ±4.4                         | 11.1 ±4.5                        | 11.8 ±5.2                     |
| <b>SvO<sub>2</sub> (%)</b>                 | 62 ±9 <sup>#</sup>               | 60 ±8                             | 60 ±10                           | 57 ±9 <sup>z</sup>            |
| <b>Cardiac Output (L/min)</b>              | 4.3 ±1.6                         | 4.1 ±1.5                          | 3.8 ±1.2                         | 3.7 ±1.1                      |
| <b>Cardiac Index (L/min/m<sup>2</sup>)</b> | 2.3 ±0.8                         | 2.2 ±0.7                          | 2.1 ±0.6                         | 2.0 ±0.6                      |
| <b>FEV1 %</b>                              | 89 ±15                           | 88 ±16                            | 88 ±17                           | 91 ±20                        |
| <b>FVC %</b>                               | 100 ±17 <sup>¶</sup>             | 105 ±17 <sup>z, *</sup>           | 97±19 <sup>¶</sup>               | 100 ±19                       |
| <b>FEV1/FVC</b>                            | 75 ±9 <sup>¶, *, #</sup>         | 66 ±8 <sup>z, *</sup>             | 72 ±7 <sup>z, ¶</sup>            | 71 ±10 <sup>z</sup>           |
| <b>D<sub>Lco</sub> %pred</b>               | 56 ±20 <sup>¶, *, #</sup>        | 31 ±14 <sup>z, #</sup>            | 31±13 <sup>z, #</sup>            | 25 ±7 <sup>¶, *, z</sup>      |
| <b>ISWD (m)</b>                            | 210 (80, 360) <sup>¶, *, #</sup> | 90 (40, 190) <sup>z</sup>         | 60 (20, 140) <sup>z</sup>        | 90 (30, 120) <sup>z</sup>     |

Data are presented as mean ±SD or median (Q1, Q3). <sup>z</sup> p<0.05 in comparison to IPAH<sub>no-LD</sub>, <sup>¶</sup> p<0.05 in comparison to mild LD emphysema, <sup>\*</sup> p<0.05 in comparison to mild LD fibrosis, <sup>#</sup> p<0.05 in comparison to mild LD mixed

Abbreviations: IPAH = idiopathic pulmonary arterial hypertension, IPAH<sub>no-LD</sub> = IPAH with no lung disease, IPAH<sub>mild-LD</sub> = IPAH with mild lung disease, WHO FC = World Health Organisation functional class, BMI = body mass index, mRAP = mean right atrial pressure, mPAP = mean pulmonary arterial pressure, PAWP = pulmonary arterial wedge pressure, PVR = pulmonary vascular resistance, SvO<sub>2</sub> = mixed venous oxygen saturations, D<sub>Lco</sub> %pred= diffusing capacity for carbon monoxide percent-predicted, ISWD = incremental shuttle walking test distance.

**Online supplement table S2: Demographics for subgroups of IPAH**

|                                            | <b>IPAH<sub>no-LD</sub></b> | <b>IPAH<sub>mild-LD</sub></b> | <b>IPAH<sub>D<sub>LCO</sub>&lt;45</sub></b> | <b>IPAH<sub>D<sub>LCO</sub>≥45</sub></b> |
|--------------------------------------------|-----------------------------|-------------------------------|---------------------------------------------|------------------------------------------|
| <b>Number</b>                              | 303                         | 190                           | 79                                          | 174                                      |
| <b>Female (%)</b>                          | 73                          | 47                            | 66                                          | 77                                       |
| <b>Age</b>                                 | 53 ±17                      | 70 ±10                        | 65 ±12                                      | 48 ±16                                   |
| <b>WHO FC I/II/III/IV (%)</b>              | 0/21/60/19                  | 0/9/56/35                     | 0/12/57/31                                  | 0/24/65/11                               |
| <b>mRAP (mmHg)</b>                         | 11 ±6                       | 11 ±5                         | 11 ±7                                       | 11 ±6                                    |
| <b>mPAP (mmHg)</b>                         | 55 ±13                      | 50 ±9                         | 51 ±10                                      | 56 ±14                                   |
| <b>PAWP (mmHg)</b>                         | 10 ±3                       | 11 ±3                         | 10 ±3                                       | 10 ±3                                    |
| <b>PVR (WU)</b>                            | 11.9 ±5.8                   | 11.1 ±4.5                     | 11.4 ±5.3                                   | 12.3 ±6.1                                |
| <b>SvO<sub>2</sub> (%)</b>                 | 62 ±9                       | 59 ±9                         | 60 ±9                                       | 63 ±9                                    |
| <b>Cardiac Output (L/min)</b>              | 4.3 ±1.6                    | 4.0 ±1.4                      | 4.2 ±1.6                                    | 4.2 ±1.4                                 |
| <b>Cardiac Index (L/min/m<sup>2</sup>)</b> | 2.3 ±0.8                    | 2.2 ±0.7                      | 2.3 ±0.9                                    | 2.3 ±0.8                                 |
| <b>FEV1 %</b>                              | 89 ±15                      | 89 ±17                        | 88 ±19                                      | 91 ±13                                   |
| <b>FVC %</b>                               | 100 ±17                     | 103 ±18                       | 100 ±20                                     | 100 ±15                                  |
| <b>FEV1/FVC</b>                            | 75 ±9                       | 68 ±8                         | 71 ±10                                      | 76 ±7                                    |
| <b>D<sub>LCO</sub> %pred</b>               | 56 ±20                      | 30 ±13                        | 32 ±7                                       | 67 ±13                                   |
| <b>ISWD (m)</b>                            | 210 (80, 360)               | 80 (40, 180)                  | 80 (30, 210)                                | 260 (130, 430)                           |
| <b>emPHasis-10 score</b>                   | 32 (20,40)                  | 32 (26, 41)                   | 38 (33, 44)                                 | 28 (20, 35)                              |
| <b>One-year mortality (%)</b>              | 4.9                         | 21.5                          | 14.2                                        | 1.2                                      |

Abbreviations: IPAH = idiopathic pulmonary arterial hypertension, IPAH<sub>no-LD</sub> = IPAH with no lung disease, IPAH<sub>mild-LD</sub> = IPAH with mild lung disease, IPAH<sub>D<sub>LCO</sub><45</sub> = IPAH with D<sub>LCO</sub> <45%, IPAH<sub>D<sub>LCO</sub>≥45</sub> = IPAH with D<sub>LCO</sub> ≥45%, WHO FC = World Health Organisation functional class, BMI = body mass index, mRAP = mean right atrial pressure, mPAP = mean pulmonary arterial pressure, PAWP = pulmonary arterial wedge pressure, PVR = pulmonary vascular resistance, SvO<sub>2</sub> = mixed venous oxygen saturations, D<sub>LCO</sub> %pred = diffusing capacity for carbon monoxide percent predicted, ISWD = incremental shuttle walking test distance.

Online supplement table S3: Demographics in patients with follow-up data available

|                                       | IPAH <sub>no-LD</sub>      | IPAH <sub>mild-LD</sub>   | IPAH <sub>DlCO&lt;45</sub> | IPAH <sub>DlCO≥45</sub>     | IPAH <sub>no-LD</sub> *    | IPAH <sub>mild-LD</sub> *  |
|---------------------------------------|----------------------------|---------------------------|----------------------------|-----------------------------|----------------------------|----------------------------|
| Number                                | 215                        | 124                       | 47                         | 139                         | 79                         | 32                         |
| Female (%)                            | 73 <sup>¶</sup>            | 47 <sup>¶</sup>           | 66                         | 77                          | 85 <sup>#</sup>            | 31 <sup>#</sup>            |
| Age                                   | 51 ±17 <sup>¶</sup>        | 70 ±10 <sup>¶</sup>       | 65 ±13 <sup>‡</sup>        | 48 ±16 <sup>‡</sup>         | 51 ±17 <sup>#</sup>        | 69 ±9 <sup>#</sup>         |
| WHO FC I/II/III/IV (%)                | 0/23/60/17                 | 0/10/64/26                | 0/11/66/23                 | 0/26/63/11                  | 0/16/70/14                 | 0/3/63/34                  |
| BMI (kg/m <sup>2</sup> )              | 29 ±6                      | 28 ±6                     | 29 ±6                      | 29 ±6                       | 30 ±7                      | 30 ±6                      |
| mRAP (mmHg)                           | 11 ±6                      | 11 ±5                     | 11 ±6                      | 11 ±6                       | 13 ±6                      | 12 ±4                      |
| mPAP (mmHg)                           | 56 ±12 <sup>¶</sup>        | 50 ±9 <sup>¶</sup>        | 52 ±9 <sup>‡</sup>         | 56 ±13 <sup>‡</sup>         | 60 ±13 <sup>#</sup>        | 55 ±10 <sup>#</sup>        |
| PAWP (mmHg)                           | 10 ±3                      | 11 ±3                     | 10 ±3                      | 10 ±3                       | 10 ±4 <sup>#</sup>         | 12 ±3 <sup>#</sup>         |
| PVR (WU)                              | 12.0 ±5.7 <sup>¶</sup>     | 10.7 ±4.4 <sup>¶</sup>    | 11.6 ±4.8                  | 12.4 ±5.9                   | 14.4 ±5.0 <sup>#</sup>     | 11.6 ±3.8 <sup>#</sup>     |
| SvO <sub>2</sub> (%)                  | 62 ±9 <sup>¶</sup>         | 59 ±9 <sup>¶</sup>        | 60 ±10 <sup>‡</sup>        | 63 ±9 <sup>‡</sup>          | 60 ±9                      | 58 ±6                      |
| Cardiac Output (L/min)                | 4.3 ±1.5                   | 4.0 ±1.4                  | 4.1 ±1.5                   | 4.1 ±1.3                    | 3.8 ±1.2                   | 3.9 ±1.3                   |
| Cardiac Index (L/min/m <sup>2</sup> ) | 2.3 ±0.8                   | 2.2 ±0.7                  | 2.2 ±0.7                   | 2.3 ±0.7                    | 2.1 ±0.6                   | 2.0 ±0.6                   |
| FEV1 %                                | 90 ±15                     | 88 ±17                    | 88 ±20                     | 91 ±13                      | 88 ±14                     | 91 ±17                     |
| FVC %                                 | 101 ±17                    | 103 ±17                   | 102 ±22                    | 101 ±15                     | 101 ±18                    | 107 ±16                    |
| FEV1/FVC                              | 75 ±8 <sup>¶</sup>         | 67 ±9 <sup>¶</sup>        | 70 ±10 <sup>‡</sup>        | 76 ±7 <sup>‡</sup>          | 74 ±9 <sup>#</sup>         | 68 ±10 <sup>#</sup>        |
| Dlco %pred                            | 58 ±19 <sup>¶</sup>        | 31 ±14 <sup>¶</sup>       | 32 ±7 <sup>‡</sup>         | 67 ±13 <sup>‡</sup>         | 57 ±18 <sup>#</sup>        | 33 ±14 <sup>#</sup>        |
| ISWD (m)                              | 210 (80, 360) <sup>¶</sup> | 90 (40, 180) <sup>¶</sup> | 70 (20, 200) <sup>‡</sup>  | 265 (130, 430) <sup>‡</sup> | 210 (90, 340) <sup>#</sup> | 130 (50, 210) <sup>#</sup> |
|                                       |                            |                           |                            |                             |                            |                            |
| Treatment (%)                         |                            |                           |                            |                             |                            |                            |
| None                                  | 1                          | 0                         | 0                          | 1                           | 0                          | 0                          |
| CCB                                   | 6                          | 1                         | 0                          | 9                           | 0                          | 0                          |
| Oral mono                             | 13                         | 34                        | 17                         | 11                          | 0                          | 0                          |
| Combo oral                            | 48                         | 45                        | 53                         | 47                          | 66                         | 69                         |
| Prostanoid +/- oral                   | 32                         | 20                        | 30                         | 32                          | 34                         | 31                         |

\* denotes subgroups of patients receiving combination oral therapy within 6 months of diagnosis

Data are presented as mean  $\pm$ SD or median (Q1, Q3). <sup>¶</sup> p<0.05 between IPAH<sub>no-LD</sub> and IPAH<sub>mild-LD</sub>, <sup>¥</sup> p<0.05 between IPAH<sub>DlCO<45</sub> and IPAH<sub>DlCO $\geq$ 45</sub>, <sup>#</sup> p<0.05 between IPAH<sub>no-LD</sub> and IPAH<sub>mild-LD</sub> (patients receiving oral combination therapy within 6 months of diagnosis)

Abbreviations: IPAH = idiopathic pulmonary arterial hypertension, IPAH<sub>no-LD</sub> = IPAH with no lung disease, IPAH<sub>mild-LD</sub> = IPAH with mild lung disease, IPAH<sub>DlCO<45</sub> = IPAH with DlCO <45%, IPAH<sub>DlCO $\geq$ 45</sub> = IPAH with DlCO  $\geq$ 45%, WHO FC = World Health Organisation functional class, BMI = body mass index, mRAP = mean right atrial pressure, mPAP = mean pulmonary arterial pressure, PAWP = pulmonary arterial wedge pressure, PVR = pulmonary vascular resistance, SvO<sub>2</sub> = mixed venous oxygen saturations, DlCO %pred = diffusing capacity for carbon monoxide percent predicted, ISWD = incremental shuttle walking test distance.

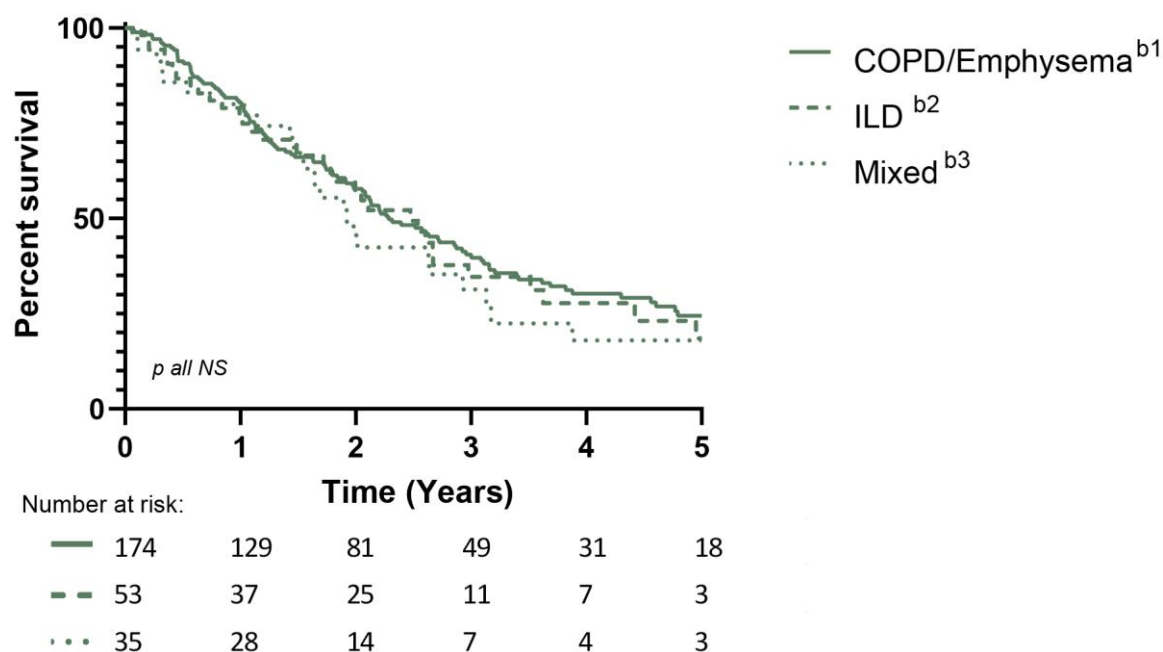

Figure S1. Survival by subtype of lung disease in IPAHmild-LD  
 Abbreviations: COPD = chronic obstructive pulmonary disease, ILD = interstitial lung disease, IPAHno-LD = idiopathic pulmonary arterial hypertension with no lung disease.

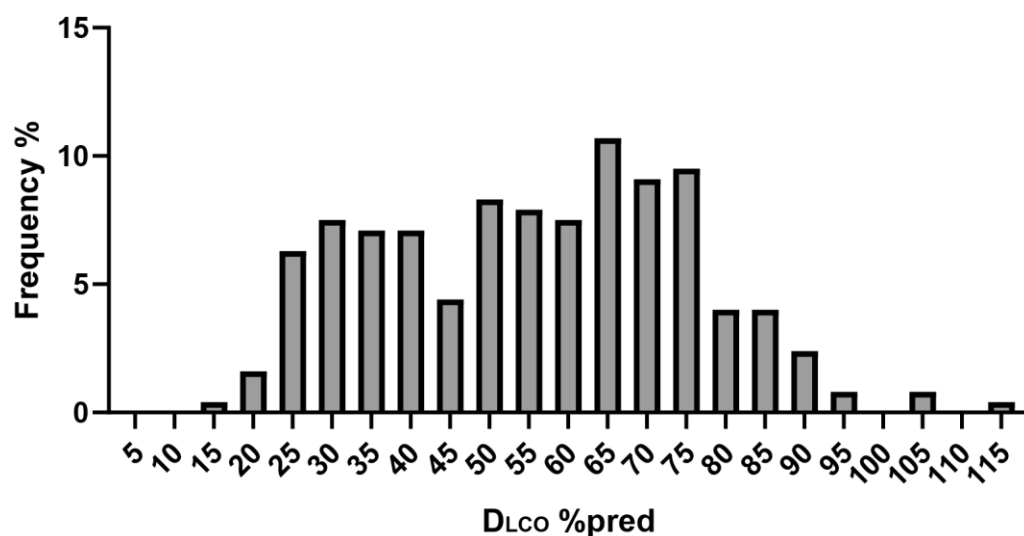

Figure S2: Distribution of DLCO %predicted in patients with IPAHno-LD  
 Abbreviations: DLCO %pred = percent-predicted diffusing capacity for carbon monoxide, IPAHno-LD = idiopathic pulmonary arterial hypertension with no lung disease.
