# Supplementary material
Source: HighWire-hosted journal article supplement (https://erj.ersjournals.com/content/55/6/2000041)
Supplement: inline-supplementary-material-2 [file inline-supplementary-material-2.pdf]

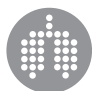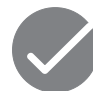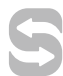

SHAREABLE PDF

# Mild parenchymal lung disease and/or low diffusion capacity impacts survival and treatment response in patients diagnosed with idiopathic pulmonary arterial hypertension

Robert A. Lewis<sup>1,2</sup>, A.A. Roger Thompson<sup>1,2</sup>, Catherine G. Billings<sup>1</sup>, Athanasios Charalampopoulos<sup>1</sup>, Charlie A. Elliot<sup>1</sup>, Neil Hamilton<sup>1</sup>, Catherine Hill<sup>3</sup>, Judith Hurdman<sup>1</sup>, Smitha Rajaram<sup>3</sup>, Ian Sabroe<sup>1,2</sup>, Andy J. Swift<sup>3,4</sup>, David G. Kiely<sup>1,2,4</sup> and Robin Condliffe<sup>1,2</sup>

**Affiliations:** <sup>1</sup>Sheffield Pulmonary Vascular Disease Unit, Royal Hallamshire Hospital, Sheffield, UK. <sup>2</sup>Dept of Infection, Immunity and Cardiovascular Disease, University of Sheffield, Sheffield, UK. <sup>3</sup>Dept of Academic Radiology, University of Sheffield, Sheffield, UK. <sup>4</sup>Insigneo Institute for *in silico* Medicine, University of Sheffield, Sheffield, UK.

**Correspondence:** Robin Condliffe, Sheffield Pulmonary Vascular Disease Unit, Royal Hallamshire Hospital, Sheffield, S10 2JF, UK. E-mail: robin.condliffe@nhs.net

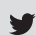

@ERSpublications

**Patients with IPAH who have mild parenchymal lung disease have significantly worse outcomes, in terms of survival and treatment response, when compared to patients with IPAH who do not have evidence of parenchymal lung disease** <http://bit.ly/3agkYn0>

**Cite this article as:** Lewis RA, Thompson AAR, Billings CG, *et al.* Mild parenchymal lung disease and/or low diffusion capacity impacts survival and treatment response in patients diagnosed with idiopathic pulmonary arterial hypertension. *Eur Respir J* 2020; 55: 2000041 [<https://doi.org/10.1183/13993003.00041-2020>].

This single-page version can be shared freely online.

**ABSTRACT** There are limited published data defining survival and treatment response in patients with mild lung disease and/or reduced gas transfer who fulfil diagnostic criteria for idiopathic pulmonary arterial hypertension (IPAH).

Patients diagnosed with IPAH between 2001 and 2019 were identified in the ASPIRE (Assessing the Spectrum of Pulmonary Hypertension Identified at a Referral Centre) registry. Using prespecified criteria based on computed tomography (CT) imaging and spirometry, patients with a diagnosis of IPAH and no lung disease were termed IPAH<sub>no-LD</sub> (n=303), and those with minor/mild emphysema or fibrosis were described as IPAH<sub>mild-LD</sub> (n=190).

Survival was significantly better in IPAH<sub>no-LD</sub> than in IPAH<sub>mild-LD</sub> (1- and 5-year survival 95% and 70% versus 78% and 22%, respectively; p<0.0001). In the combined group of IPAH<sub>no-LD</sub> and IPAH<sub>mild-LD</sub>, independent predictors of higher mortality were increasing age, lower diffusing capacity of the lung for carbon monoxide ( $D_{LCO}$ ), lower exercise capacity and a diagnosis of IPAH<sub>mild-LD</sub> (all p<0.05). Exercise capacity and quality of life improved (both p<0.0001) following treatment in patients with IPAH<sub>no-LD</sub>, but not IPAH<sub>mild-LD</sub>. A proportion of patients with IPAH<sub>no-LD</sub> had a  $D_{LCO}$  <45%; these patients had poorer survival than patients with  $D_{LCO}$  ≥45%, although they demonstrated improved exercise capacity following treatment.

The presence of even mild parenchymal lung disease in patients who would be classified as IPAH according to current recommendations has a significant adverse effect on outcomes. This phenotype can be identified using lung function testing and clinical CT reports. Patients with IPAH, no lung disease and severely reduced  $D_{LCO}$  may represent a further distinct phenotype. These data suggest that randomised controlled trials of targeted therapies in patients with these phenotypes are required.
